# Supplementary material
Source: PubMed Central journal article supplement (PMC3821074)
Supplement: NIHMS512710-supplement-01.pdf [file NIHMS512710-supplement-01.pdf]

Nature Methods

**Enhanced Y1H assays for Arabidopsis**

Allison Gaudinier, Lifang Zhang, John S Reece-Hoyes, Mallorie Taylor-Teeple, Li Pu, Zhijie Liu, Ghislain Breton, Jose L Pruneda-Paz, Dahae Kim, Steve A Kay, Albertha J M Walhout, Doreen Ware & Siobhan M Brady

**Supplementary Figure 1** Description of clones and their sources

**Supplementary Figure 2** AD-2 $\mu$  with mating is the most sensitive assay.

**Supplementary Figure 3** The number of confirmed regulatory interactions obtained.

**Supplementary Table 1** The 653 transcription factors in the stele collection

**Supplementary Table 2** Identified transcription factor-promoter interactions.

**Supplementary Table 3** Interacting transcription factors.

**Supplementary Notes** Identification of TFs Expressed in the Root Stele; Comparison of Direct Transformation vs. Mating and the High Copy Number and Low Copy Number AD Vector; and Comparison of Efficiency in Labor, Cost and Time

Supplementary Figure 1

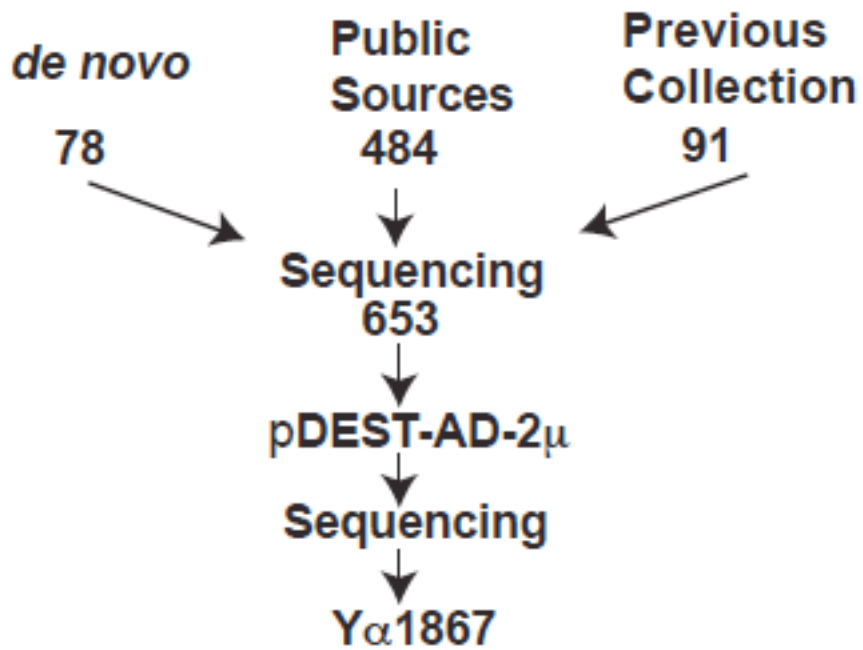

Transcription factors in the resource were cloned *de novo*, obtained from our previous collection or from public sources, were fully sequenced, and then recombined with the activation domain vector. Clones were sequenced and then subsequently transformed in the Yα1867 yeast strain.

**Supplementary Figure 2**

**a**

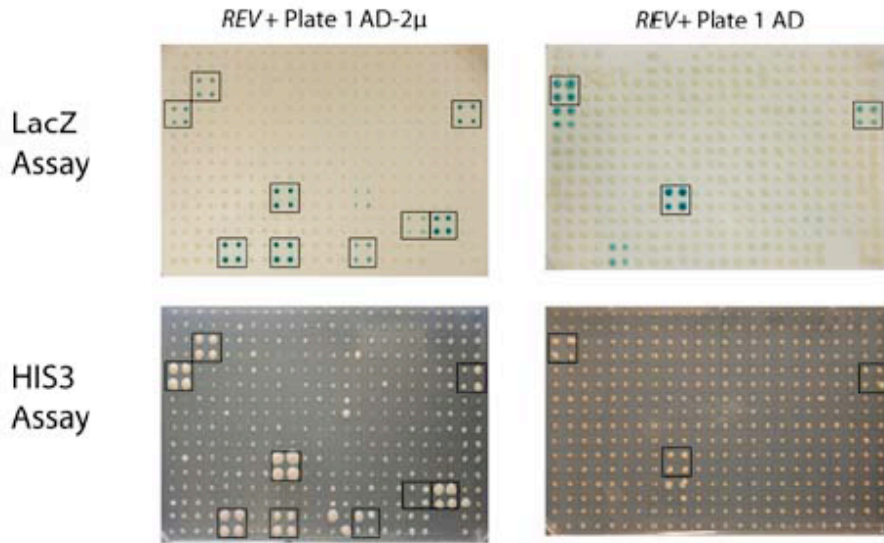

**b**

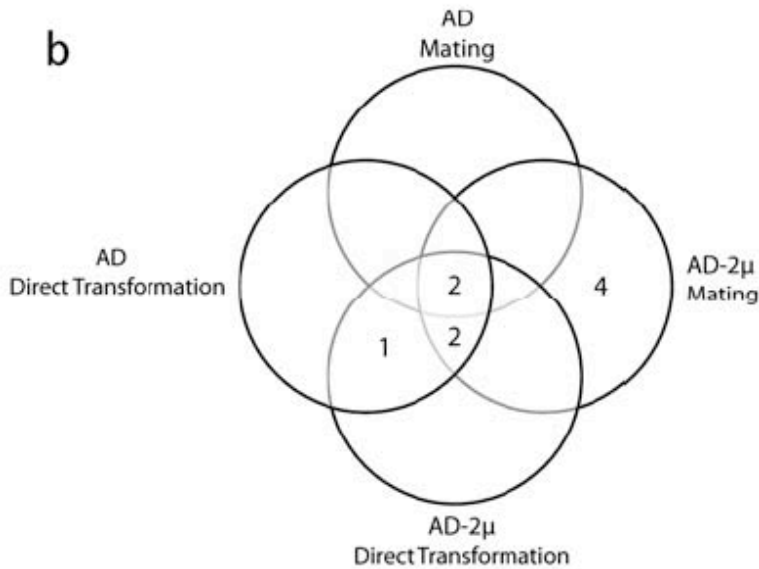

Using the *REV* promoter, mating with the AD-2 $\mu$  vector was the most sensitive assay. (a) Pictures of the reporter plates of screens resulting from mating of the *REV* promoter with transcription factor Plate 1 of the AD (low copy) and AD-2 $\mu$  vectors. The black boxes indicate a positive interaction observed with both reporters (*HIS3* and *LacZ*). (b) Venn diagram of interaction overlap between the direct transformation and mating assays using the AD and AD-2 $\mu$  vectors. There was 100% overlap between the interactions obtained for the direct transformation assays of the AD and AD-2 $\mu$  vectors. There was a 25% overlap between the AD and AD-2 $\mu$  vectors in the mating assay. There was 50% overlap of interactions obtained from mating with the AD-2 $\mu$  vector and the direct transformation assays. Moreover, two of the positives detected with mating the AD-2 $\mu$  vector were obtained as weak positives with only one reporter, *LacZ*, in the direct transformation assays with both vectors.

### Supplementary Figure 3

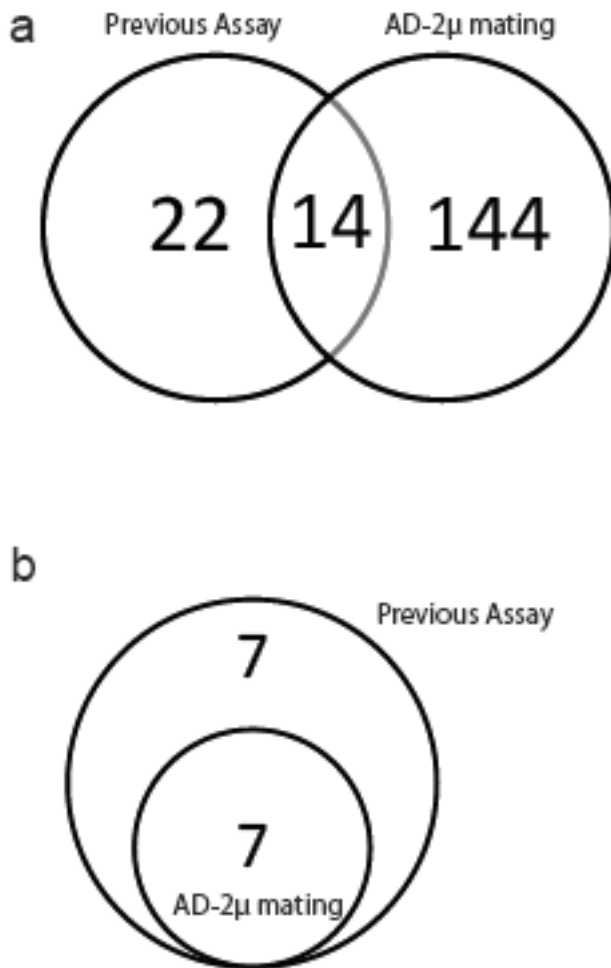

A comparison of direct transformation versus mating with the different activation domain vectors and the number of confirmed regulatory interactions identified. **(a)** Venn diagram showing the number of interactions obtained with the previous screen using direct transformation with the activation domain vector (left circle), mating with the AD-2 $\mu$  vector (right circle) and their overlap. 14 out of 36 (39%) of the previously identified interactions were obtained. **(b)** Venn diagram showing the number of interactions from the previous screen which have been confirmed to be regulatory *in planta* (14), the interactions obtained from mating with the AD-2 $\mu$  vector (7) and their overlap

**Supplementary Table 1**

| AGI       | pENTR Source | Gene Model  | Family       |
|-----------|--------------|-------------|--------------|
| At1g22985 | Brady        | AT1G22985.1 | AP2/EREBP    |
| At1g78080 | Brady        | AT1G78080.1 | AP2/EREBP    |
| At2g23340 | Brady        | AT2G23340.1 | AP2/EREBP    |
| At2g44940 | Brady        | AT2G44940.1 | AP2/EREBP    |
| At3g16280 | Brady        | AT3G16280.1 | AP2/EREBP    |
| At3g60490 | Brady        | AT3G60490.1 | AP2/EREBP    |
| At4g36920 | Brady        | AT4G36920.1 | AP2/EREBP    |
| At5g51190 | Brady        | AT5G51190.1 | AP2/EREBP    |
| At1g04550 | Brady        | AT1G04550.1 | AUX/IAA      |
| At3g16500 | Brady        | AT3G16500.1 | AUX/IAA      |
| At4g28640 | Brady        | AT4G28640.1 | AUX/IAA      |
| At5g25890 | Brady        | AT5G25890.1 | AUX/IAA      |
| At2g43060 | Brady        | AT2G43060.1 | BHLH         |
| At3g06590 | Brady        | AT3G06590.1 | BHLH         |
| At3g23210 | Brady        | AT3G23210.1 | BHLH         |
| At3g25710 | Brady        | AT3G25710.1 | BHLH         |
| At3g56980 | Brady        | AT3G56980.1 | BHLH         |
| At3g62090 | Brady        | AT3G62090.1 | BHLH         |
| At4g02590 | Brady        | AT4G02590.1 | BHLH         |
| At4g36540 | Brady        | AT4G36540.1 | BHLH         |
| At2g22850 | Brady        | AT2G22850.1 | BZIP         |
| At3g19290 | Brady        | AT3G19290.1 | BZIP         |
| At4g37730 | Brady        | AT4G37730.1 | BZIP         |
| At5g06960 | Brady        | AT5G06960.1 | BZIP         |
| At3g21890 | Brady        | AT3G21890.1 | C2C2-CO-LIKE |
| At1g07640 | Brady        | AT1G07640.1 | C2C2-DOF     |
| At1g29160 | Brady        | AT1G29160.1 | C2C2-DOF     |
| At1g64620 | Brady        | AT1G64620.1 | C2C2-DOF     |
| At2g28810 | Brady        | AT2G28810.1 | C2C2-DOF     |
| At2g37590 | Brady        | AT2G37590.1 | C2C2-DOF     |
| At3g45610 | Brady        | AT3G45610.1 | C2C2-DOF     |
| At3g55370 | Brady        | AT3G55370.1 | C2C2-DOF     |
| At3g61850 | Brady        | AT3G61850.1 | C2C2-DOF     |
| At2g18380 | Brady        | AT2G18380.1 | C2C2-GATA    |
| At4g36620 | Brady        | AT4G36620.1 | C2C2-GATA    |
| At5g25830 | Brady        | AT5G25830.1 | C2C2-GATA    |
| At2g01940 | Brady        | AT2G01940.1 | C2H2         |
| At2g28200 | Brady        | AT2G28200.1 | C2H2         |
| At3g05760 | Brady        | AT3G05760.1 | C2H2         |

|           |       |             |            |
|-----------|-------|-------------|------------|
| At5g03510 | Brady | AT5G03510.1 | C2H2       |
| At1g54160 | Brady | AT1G54160.1 | CCAAT-HAP2 |
| At5g47640 | Brady | AT5G47640.1 | CCAAT-HAP3 |
| At4g14770 | Brady | AT4G14770.1 | CPP        |
| At1g21450 | Brady | AT1G21450.1 | GRAS       |
| At2g04890 | Brady | AT2G04890.1 | GRAS       |
| At4g37650 | Brady | AT4G37650.1 | GRAS       |
| At2g22840 | Brady | AT2G22840.1 | GRF        |
| At1g23380 | Brady | AT1G23380.1 | HB         |
| At2g16400 | Brady | AT2G16400.1 | HB         |
| At2g22800 | Brady | AT2G22800.1 | HB         |
| At2g34710 | Brady | AT2G34710.1 | HB         |
| At2g46680 | Brady | AT2G46680.1 | HB         |
| At4g37790 | Brady | AT4G37790.1 | HB         |
| At5g06710 | Brady | AT5G06710.1 | HB         |
| At5g53980 | Brady | AT5G53980.1 | HB         |
| At5g60690 | Brady | AT5G60690.1 | HB         |
| At1g77570 | Brady | AT1G77570.1 | HSF        |
| At2g42830 | Brady | AT2G42830.1 | MADS       |
| At3g57230 | Brady | AT3G57230.1 | MADS       |
| At5g13790 | Brady | AT5G13790.1 | MADS       |
| At1g16490 | Brady | AT1G16490.1 | MYB        |
| At1g17950 | Brady | AT1G17950.1 | MYB        |
| At1g18570 | Brady | AT1G18570.1 | MYB        |
| At1g66230 | Brady | AT1G66230.1 | MYB        |
| At3g06490 | Brady | AT3G06490.1 | MYB        |
| At3g08500 | Brady | AT3G08500.1 | MYB        |
| At3g11280 | Brady | AT3G11280.1 | MYB        |
| At3g24310 | Brady | AT3G24310.1 | MYB        |
| At3g46130 | Brady | AT3G46130.1 | MYB        |
| At4g12350 | Brady | AT4G12350.1 | MYB        |
| At4g22680 | Brady | AT4G22680.1 | MYB        |
| At5g12870 | Brady | AT5G12870.1 | MYB        |
| At5g37260 | Brady | AT5G37260.1 | MYB        |
| At5g59780 | Brady | AT5G59780.1 | MYB        |
| At1g02220 | Brady | AT1G02220.1 | NAC        |
| At1g54330 | Brady | AT1G54330.1 | NAC        |
| At1g71930 | Brady | AT1G71930.1 | NAC        |
| At2g18060 | Brady | AT2G18060.1 | NAC        |
| At2g27300 | Brady | AT2G27300.1 | NAC        |
| At2g33480 | Brady | AT2G33480.1 | NAC        |
| At3g15510 | Brady | AT3G15510.1 | NAC        |

|           |         |             |              |
|-----------|---------|-------------|--------------|
| At3g17730 | Brady   | AT3G17730.1 | NAC          |
| At4g29230 | Brady   | AT4G29230.1 | NAC          |
| At5g50820 | Brady   | AT5G50820.1 | NAC          |
| At5g64530 | Brady   | AT5G64530.1 | NAC          |
| At2g45680 | Brady   | AT2G45680.1 | TCP          |
| At1g13450 | Brady   | AT1G13450.1 | TRIHILIX     |
| At2g04880 | Brady   | AT2G04880.1 | WRKY         |
| At5g13080 | Brady   | AT5G13080.1 | WRKY         |
| At5g49520 | Brady   | AT5G49520.1 | WRKY         |
| At5g56270 | Brady   | AT5G56270.1 | WRKY         |
| At1g74660 | Brady   | AT1G74660.1 | ZF-HD        |
| At3g42790 | de novo | AT3G42790.1 | ALFIN-LIKE   |
| At3g14230 | de novo | AT3G14230.2 | AP2/EREBP    |
| At3g25730 | de novo | AT3G25730.1 | AP2/EREBP    |
| At4g17490 | de novo | AT4G17490.1 | AP2/EREBP    |
| At4g23750 | de novo | AT4G23750.1 | AP2/EREBP    |
| At5g05410 | de novo | AT5G05410.1 | AP2/EREBP    |
| At5g07580 | de novo | AT5G07580.1 | AP2/EREBP    |
| At5g10510 | de novo | AT5G10510.2 | AP2/EREBP    |
| At5g18560 | de novo | AT5G18560.1 | AP2/EREBP    |
| At5g52020 | de novo | AT5G52020.1 | AP2/EREBP    |
| At5g61590 | de novo | AT5G61590.1 | AP2/EREBP    |
| At5g61600 | de novo | AT5G61600.1 | AP2/EREBP    |
| At1g19220 | de novo | AT1G19220.1 | ARF          |
| At5g20730 | de novo | AT5G20730.2 | ARF          |
| At1g09250 | de novo | AT1G09250.1 | BHLH         |
| At1g51140 | de novo | AT1G51140.1 | BHLH         |
| At2g22770 | de novo | AT2G22770.1 | BHLH         |
| At2g31730 | de novo | AT2G31730.1 | BHLH         |
| At3g17100 | de novo | AT3G17100.1 | BHLH         |
| At3g23690 | de novo | AT3G23690.1 | BHLH         |
| At4g37850 | de novo | AT4G37850.1 | BHLH         |
| At5g46760 | de novo | AT5G46760.1 | BHLH         |
| At5g58010 | de novo | AT5G58010.1 | BHLH         |
| At1g32150 | de novo | AT1G32150.1 | BZIP         |
| At2g40950 | de novo | AT2G40950.1 | BZIP         |
| At4g34000 | de novo | AT4G34000.1 | BZIP         |
| At4g36730 | de novo | AT4G36730.1 | BZIP         |
| At5g54470 | de novo | AT5G54470.1 | C2C2-CO-LIKE |
| At3g47500 | de novo | AT3G47500.1 | C2C2-DOF     |
| At5g66320 | de novo | AT5G66320.1 | C2C2-GATA    |
| At2g19380 | de novo | AT2G19380.1 | C2H2         |

|           |         |             |           |
|-----------|---------|-------------|-----------|
| At3g02860 | de novo | AT3G02860.2 | C2H2      |
| At3g12270 | de novo | AT3G12270.1 | C2H2      |
| At3g19580 | de novo | AT3G19580.1 | C2H2      |
| At3g44750 | de novo | AT3G44750.1 | C2H2      |
| At5g01160 | de novo | AT5G01160.1 | C2H2      |
| At5g04340 | de novo | AT5G04340.1 | C2H2      |
| At5g26610 | de novo | AT5G26610.1 | C2H2      |
| At5g66730 | de novo | AT5G66730.1 | C2H2      |
| At2g22900 | de novo | AT2G22900.1 | CAMTA     |
| At3g22760 | de novo | AT3G22760.1 | CPP       |
| At5g03415 | de novo | AT5G03415.1 | E2F/DP    |
| At3g20770 | de novo | AT3G20770.1 | EIL       |
| At1g44810 | de novo | AT1G44810.1 | GEBP      |
| At1g61730 | de novo | AT1G61730.1 | GEBP      |
| At1g07520 | de novo | AT1G07520.1 | GRAS      |
| At1g63100 | de novo | AT1G63100.1 | GRAS      |
| At2g45160 | de novo | AT2G45160.1 | GRAS      |
| At1g27050 | de novo | AT1G27050.1 | HB        |
| At1g30810 | de novo | AT1G30810.1 | JUMONJI   |
| At1g63490 | de novo | AT1G63490.1 | JUMONJI   |
| At1g58220 | de novo | AT1G58220.1 | MYB       |
| At1g63910 | de novo | AT1G63910.1 | MYB       |
| At1g70000 | de novo | AT1G70000.1 | MYB       |
| At1g74840 | de novo | AT1G74840.1 | MYB       |
| At2g47190 | de novo | AT2G47190.1 | MYB       |
| At4g01680 | de novo | AT4G01680.1 | MYB       |
| At4g34990 | de novo | AT4G34990.1 | MYB       |
| At4g37260 | de novo | AT4G37260.1 | MYB       |
| At4g38620 | de novo | AT4G38620.1 | MYB       |
| At3g04070 | de novo | AT3G04070.1 | NAC       |
| At5g09330 | de novo | AT5G09330.1 | NAC       |
| At1g76350 | de novo | AT1G76350.1 | NIN-LIKE  |
| At1g47270 | de novo | AT1G47270.2 | TUB       |
| At1g13960 | de novo | AT1G13960.1 | WRKY      |
| At1g29280 | de novo | AT1G29280.1 | WRKY      |
| At1g69310 | de novo | AT1G69310.1 | WRKY      |
| At3g01970 | de novo | AT3G01970.1 | WRKY      |
| At1g69600 | de novo | AT1G69600.1 | ZF-HD     |
| At4g32010 | de novo | AT4G32010.1 | ABI3/VP1  |
| At5g17430 | de novo | AT5G17430.1 | AP2/EREBP |
| At2g46510 | de novo | AT2G46510.1 | BHLH      |
| At4g37740 | de novo | AT4G37740.1 | GRF       |
| At4g36740 | de novo | AT4G36740.1 | HB        |
| At1g28470 | de novo | AT1G28470.1 | NAC       |



|           |                                                                                             |             |                  |
|-----------|---------------------------------------------------------------------------------------------|-------------|------------------|
| At1g62700 | de novo                                                                                     | AT1G62700.1 | NAC              |
| At4g36160 | de novo                                                                                     | AT4G36160.1 | NAC              |
| At3g10040 | de novo                                                                                     | AT3G10040.1 | TRIHELIX         |
| At1g68200 | from Beverly Underwood,<br>Yongli Xiao, Julia Redman,<br>Erin Monaghan,<br>Christopher Town | AT1G68200.1 | C3H              |
| At1g30490 | PY(Peking-Yale)                                                                             | AT1G30490.1 | HB               |
| At2g36080 | REGIA                                                                                       | AT2G36080.1 | ABI3/VP1         |
| At3g11580 | REGIA                                                                                       | AT3G11580.1 | ABI3/VP1         |
| At1g71450 | REGIA                                                                                       | AT1G71450.1 | AP2/EREBP        |
| At3g20840 | REGIA                                                                                       | AT3G20840.1 | AP2/EREBP        |
| At3g61630 | REGIA                                                                                       | AT3G61630.1 | AP2/EREBP        |
| At4g18450 | REGIA                                                                                       | AT4G18450.1 | AP2/EREBP        |
| At4g36900 | REGIA                                                                                       | AT4G36900.1 | AP2/EREBP        |
| At1g59750 | REGIA                                                                                       | AT1G59750.1 | ARF              |
| At3g62100 | REGIA                                                                                       | AT3G62100.1 | AUX/IAA          |
| At1g09530 | REGIA                                                                                       | AT1G09530.1 | BHLH             |
| At1g51070 | REGIA                                                                                       | AT1G51070.1 | BHLH             |
| At4g17880 | REGIA                                                                                       | AT4G17880.1 | BHLH             |
| At1g08320 | REGIA                                                                                       | AT1G08320.1 | BZIP             |
| At3g12250 | REGIA                                                                                       | AT3G12250.1 | BZIP             |
| At5g10030 | REGIA                                                                                       | AT5G10030.1 | BZIP             |
| At5g24800 | REGIA                                                                                       | AT5G24800.1 | BZIP             |
| At2g47890 | REGIA                                                                                       | AT2G47890.1 | C2C2-CO-<br>LIKE |
| At4g39070 | REGIA                                                                                       | AT4G39070.1 | C2C2-CO-<br>LIKE |
| At5g02460 | REGIA                                                                                       | AT5G02460.1 | C2C2-DOF         |
| At3g53340 | REGIA                                                                                       | AT3G53340.1 | CCAAT-<br>HAP3   |
| At2g29060 | REGIA                                                                                       | AT2G29060.1 | GRAS             |
| At3g46600 | REGIA                                                                                       | AT3G46600.1 | GRAS             |
| At4g36710 | REGIA                                                                                       | AT4G36710.1 | GRAS             |
| At1g52150 | REGIA                                                                                       | AT1G52150.1 | HB               |
| At4g00730 | REGIA                                                                                       | AT4G00730.1 | HB               |
| At4g34610 | REGIA                                                                                       | AT4G34610.1 | HB               |
| At5g59340 | REGIA                                                                                       | AT5G59340.1 | HB               |
| At5g65310 | REGIA                                                                                       | AT5G65310.1 | HB               |
| At1g67970 | REGIA                                                                                       | AT1G67970.1 | HSF              |
| At2g26150 | REGIA                                                                                       | AT2G26150.1 | HSF              |
| At1g17310 | REGIA                                                                                       | AT1G17310.1 | MADS             |
| At4g37940 | REGIA                                                                                       | AT4G37940.1 | MADS             |
| At5g10140 | REGIA                                                                                       | AT5G10140.1 | MADS             |
| At1g01060 | REGIA                                                                                       | AT1G01060.1 | MYB              |

|           |            |             |            |
|-----------|------------|-------------|------------|
| At1g48000 | REGIA      | AT1G48000.1 | MYB        |
| At1g79180 | REGIA      | AT1G79180.1 | MYB        |
| At5g01200 | REGIA      | AT5G01200.1 | MYB        |
| At5g11510 | REGIA      | AT5G11510.1 | MYB        |
| At5g14340 | REGIA      | AT5G14340.1 | MYB        |
| At5g16600 | REGIA      | AT5G16600.1 | MYB        |
| At5g17800 | REGIA      | AT5G17800.1 | MYB        |
| At5g49620 | REGIA      | AT5G49620.1 | MYB        |
| At5g60890 | REGIA      | AT5G60890.1 | MYB        |
| At5g61420 | REGIA      | AT5G61420.1 | MYB        |
| At1g01720 | REGIA      | AT1G01720.1 | NAC        |
| At1g32870 | REGIA      | AT1G32870.1 | NAC        |
| At3g03200 | REGIA      | AT3G03200.1 | NAC        |
| At4g01550 | REGIA      | AT4G01550.1 | NAC        |
| At1g35560 | REGIA      | AT1G35560.1 | TCP        |
| At4g25470 | REGIA/SALK | AT4G25470.1 | AP2/EREBP  |
| At1g04250 | REGIA/SALK | AT1G04250.1 | AUX/IAA    |
| At2g46990 | REGIA/SALK | AT2G46990.1 | AUX/IAA    |
| At4g14550 | REGIA/SALK | AT4G14550.1 | AUX/IAA    |
| At1g03970 | REGIA/SALK | AT1G03970.1 | BZIP       |
| At3g21175 | REGIA/SALK | AT3G21175.1 | C2C2-GATA  |
| At3g24050 | REGIA/SALK | AT3G24050.1 | C2C2-GATA  |
| At4g24470 | REGIA/SALK | AT4G24470.1 | C2C2-GATA  |
| At2g37430 | REGIA/SALK | AT2G37430.1 | C2H2       |
| At2g48100 | REGIA/SALK | AT2G48100.1 | C2H2       |
| At5g44180 | REGIA/SALK | AT5G44180.1 | HB         |
| At5g48670 | REGIA/SALK | AT5G48670.1 | MADS       |
| At1g62300 | REGIA/SALK | AT1G62300.1 | WRKY       |
| At1g68150 | REGIA/SALK | AT1G68150.1 | WRKY       |
| At2g38470 | REGIA/SALK | AT2G38470.1 | WRKY       |
| At1g25560 | SALK       | AT1G25560.1 | ABI3/VP1   |
| At3g18990 | SALK       | AT3G18990.1 | ABI3/VP1   |
| At1g14510 | SALK       | AT1G14510.1 | ALFIN-LIKE |
| At2g02470 | SALK       | AT2G02470.1 | ALFIN-LIKE |
| At3g11200 | SALK       | AT3G11200.1 | ALFIN-LIKE |
| At5g05610 | SALK       | AT5G05610.1 | ALFIN-LIKE |
| At5g26210 | SALK       | AT5G26210.1 | ALFIN-LIKE |
| At1g12610 | SALK       | AT1G12610.1 | AP2/EREBP  |
| At1g12630 | SALK       | AT1G12630.1 | AP2/EREBP  |
| At1g13260 | SALK       | AT1G13260.1 | AP2/EREBP  |
| At1g19210 | SALK       | AT1G19210.1 | AP2/EREBP  |

|           |      |             |           |
|-----------|------|-------------|-----------|
| At1g21910 | SALK | AT1G21910.1 | AP2/EREBP |
| At1g22190 | SALK | AT1G22190.1 | AP2/EREBP |
| At1g22810 | SALK | AT1G22810.1 | AP2/EREBP |
| At1g28360 | SALK | AT1G28360.1 | AP2/EREBP |
| At1g28370 | SALK | AT1G28370.1 | AP2/EREBP |
| At1g36060 | SALK | AT1G36060.1 | AP2/EREBP |
| At1g43160 | SALK | AT1G43160.1 | AP2/EREBP |
| At1g44830 | SALK | AT1G44830.1 | AP2/EREBP |
| At1g50640 | SALK | AT1G50640.1 | AP2/EREBP |
| At1g53170 | SALK | AT1G53170.1 | AP2/EREBP |
| At1g53910 | SALK | AT1G53910.1 | AP2/EREBP |
| At1g68840 | SALK | AT1G68840.1 | AP2/EREBP |
| At1g71130 | SALK | AT1G71130.1 | AP2/EREBP |
| At1g72360 | SALK | AT1G72360.1 | AP2/EREBP |
| At1g74930 | SALK | AT1G74930.1 | AP2/EREBP |
| At1g77640 | SALK | AT1G77640.1 | AP2/EREBP |
| At1g79700 | SALK | AT1G79700.1 | AP2/EREBP |
| At2g20880 | SALK | AT2G20880.1 | AP2/EREBP |
| At2g28550 | SALK | AT2G28550.1 | AP2/EREBP |
| At2g38340 | SALK | AT2G38340.1 | AP2/EREBP |
| At2g41710 | SALK | AT2G41710.1 | AP2/EREBP |
| At2g44840 | SALK | AT2G44840.1 | AP2/EREBP |
| At2g46310 | SALK | AT2G46310.1 | AP2/EREBP |
| At3g11020 | SALK | AT3G11020.1 | AP2/EREBP |
| At3g15210 | SALK | AT3G15210.1 | AP2/EREBP |
| At3g16770 | SALK | AT3G16770.1 | AP2/EREBP |
| At3g20310 | SALK | AT3G20310.1 | AP2/EREBP |
| At3g23240 | SALK | AT3G23240.1 | AP2/EREBP |
| At3g50260 | SALK | AT3G50260.1 | AP2/EREBP |
| At3g54990 | SALK | AT3G54990.1 | AP2/EREBP |
| At4g11140 | SALK | AT4G11140.1 | AP2/EREBP |
| At4g16750 | SALK | AT4G16750.1 | AP2/EREBP |
| At4g17500 | SALK | AT4G17500.1 | AP2/EREBP |
| At4g28140 | SALK | AT4G28140.1 | AP2/EREBP |
| At4g32800 | SALK | AT4G32800.1 | AP2/EREBP |
| At4g34410 | SALK | AT4G34410.1 | AP2/EREBP |
| At4g37750 | SALK | AT4G37750.1 | AP2/EREBP |
| At4g39780 | SALK | AT4G39780.1 | AP2/EREBP |
| At5g13330 | SALK | AT5G13330.1 | AP2/EREBP |
| At5g13910 | SALK | AT5G13910.1 | AP2/EREBP |
| At5g25810 | SALK | AT5G25810.1 | AP2/EREBP |
| At5g44210 | SALK | AT5G44210.1 | AP2/EREBP |
| At5g47220 | SALK | AT5G47220.1 | AP2/EREBP |
| At5g47230 | SALK | AT5G47230.1 | AP2/EREBP |

|           |      |             |           |
|-----------|------|-------------|-----------|
| At5g51990 | SALK | AT5G51990.1 | AP2/EREBP |
| At5g53290 | SALK | AT5G53290.1 | AP2/EREBP |
| At5g60120 | SALK | AT5G60120.1 | AP2/EREBP |
| At5g61890 | SALK | AT5G61890.1 | AP2/EREBP |
| At5g67190 | SALK | AT5G67190.1 | AP2/EREBP |
| At1g19850 | SALK | AT1G19850.1 | ARF       |
| At1g30330 | SALK | AT1G30330.1 | ARF       |
| At1g34310 | SALK | AT1G34310.1 | ARF       |
| At2g28350 | SALK | AT2G28350.1 | ARF       |
| At2g33860 | SALK | AT2G33860.1 | ARF       |
| At3g61830 | SALK | AT3G61830.1 | ARF       |
| At5g37020 | SALK | AT5G37020.1 | ARF       |
| At5g62000 | SALK | AT5G62000.1 | ARF       |
| At1g04880 | SALK | AT1G04880.1 | ARID      |
| At1g20910 | SALK | AT1G20910.1 | ARID      |
| At1g76510 | SALK | AT1G76510.1 | ARID      |
| At3g43240 | SALK | AT3G43240.1 | ARID      |
| At1g04100 | SALK | AT1G04100.1 | AUX/IAA   |
| At1g04240 | SALK | AT1G04240.1 | AUX/IAA   |
| At1g51950 | SALK | AT1G51950.1 | AUX/IAA   |
| At1g52830 | SALK | AT1G52830.1 | AUX/IAA   |
| At2g22670 | SALK | AT2G22670.1 | AUX/IAA   |
| At2g33310 | SALK | AT2G33310.2 | AUX/IAA   |
| At3g04730 | SALK | AT3G04730.1 | AUX/IAA   |
| At3g15540 | SALK | AT3G15540.1 | AUX/IAA   |
| At3g17600 | SALK | AT3G17600.1 | AUX/IAA   |
| At3g23030 | SALK | AT3G23030.1 | AUX/IAA   |
| At3g23050 | SALK | AT3G23050.1 | AUX/IAA   |
| At4g14560 | SALK | AT4G14560.1 | AUX/IAA   |
| At4g29080 | SALK | AT4G29080.1 | AUX/IAA   |
| At5g43700 | SALK | AT5G43700.1 | AUX/IAA   |
| At5g65670 | SALK | AT5G65670.1 | AUX/IAA   |
| At1g01260 | SALK | AT1G01260.1 | BHLH      |
| At1g03040 | SALK | AT1G03040.1 | BHLH      |
| At1g05710 | SALK | AT1G05710.1 | BHLH      |
| At1g05805 | SALK | AT1G05805.1 | BHLH      |
| At1g10120 | SALK | AT1G10120.1 | BHLH      |
| At1g31050 | SALK | AT1G31050.1 | BHLH      |
| At1g32640 | SALK | AT1G32640.1 | BHLH      |
| At1g59640 | SALK | AT1G59640.1 | BHLH      |
| At1g61660 | SALK | AT3G56400.1 | BHLH      |
| At1g68810 | SALK | AT1G68810.1 | BHLH      |
| At1g68920 | SALK | AT1G68920.1 | BHLH      |
| At1g69010 | SALK | AT1G69010.1 | BHLH      |

|           |      |             |      |
|-----------|------|-------------|------|
| At1g74500 | SALK | AT1G74500.1 | BHLH |
| At2g22760 | SALK | AT2G22760.1 | BHLH |
| At2g24260 | SALK | AT2G24260.1 | BHLH |
| At2g47270 | SALK | AT2G47270.1 | BHLH |
| At3g05800 | SALK | AT3G05800.1 | BHLH |
| At3g07340 | SALK | AT3G07340.1 | BHLH |
| At3g19860 | SALK | AT3G19860.1 | BHLH |
| At3g26744 | SALK | AT3G26744.1 | BHLH |
| At3g47640 | SALK | AT3G47640.1 | BHLH |
| At3g57800 | SALK | AT3G57800.2 | BHLH |
| At4g14410 | SALK | AT4G14410.1 | BHLH |
| At4g16430 | SALK | AT4G16430.1 | BHLH |
| At4g30410 | SALK | AT4G30410.1 | BHLH |
| At4g36930 | SALK | AT4G36930.1 | BHLH |
| At5g08130 | SALK | AT5G08130.1 | BHLH |
| At5g48560 | SALK | AT5G48560.1 | BHLH |
| At5g54680 | SALK | AT5G54680.1 | BHLH |
| At5g62610 | SALK | AT5G62610.1 | BHLH |
| At5g65640 | SALK | AT5G65640.1 | BHLH |
| At1g06070 | SALK | AT1G06070.1 | BZIP |
| At1g22070 | SALK | AT1G22070.1 | BZIP |
| At1g42990 | SALK | AT1G42990.1 | BZIP |
| At1g43700 | SALK | AT1G43700.1 | BZIP |
| At1g49720 | SALK | AT1G49720.1 | BZIP |
| At1g77920 | SALK | AT1G77920.1 | BZIP |
| At2g21230 | SALK | AT2G21230.1 | BZIP |
| At2g31370 | SALK | AT2G31370.1 | BZIP |
| At2g35530 | SALK | AT2G35530.1 | BZIP |
| At2g40620 | SALK | AT2G40620.1 | BZIP |
| At2g41070 | SALK | AT2G41070.1 | BZIP |
| At2g46270 | SALK | AT2G46270.1 | BZIP |
| At3g49760 | SALK | AT3G49760.1 | BZIP |
| At3g54620 | SALK | AT3G54620.1 | BZIP |
| At3g56850 | SALK | AT3G56850.1 | BZIP |
| At3g58120 | SALK | AT3G58120.1 | BZIP |
| At4g01120 | SALK | AT4G01120.1 | BZIP |
| At4g02640 | SALK | AT4G02640.2 | BZIP |
| At4g35040 | SALK | AT4G35040.1 | BZIP |
| At4g38900 | SALK | AT4G38900.2 | BZIP |
| At5g06950 | SALK | AT5G06950.1 | BZIP |
| At5g11260 | SALK | AT5G11260.1 | BZIP |
| At5g28770 | SALK | AT5G28770.1 | BZIP |
| At5g44080 | SALK | AT5G44080.1 | BZIP |
| At5g65210 | SALK | AT5G65210.1 | BZIP |

|           |      |             |              |
|-----------|------|-------------|--------------|
| At1g75540 | SALK | AT1G75540.1 | C2C2-CO-LIKE |
| At1g78600 | SALK | AT1G78600.1 | C2C2-CO-LIKE |
| At2g21320 | SALK | AT2G21320.1 | C2C2-CO-LIKE |
| At2g24790 | SALK | AT2G24790.1 | C2C2-CO-LIKE |
| At3g07650 | SALK | AT3G07650.1 | C2C2-CO-LIKE |
| At4g38960 | SALK | AT4G38960.2 | C2C2-CO-LIKE |
| At5g24930 | SALK | AT5G24930.1 | C2C2-CO-LIKE |
| At5g48250 | SALK | AT5G48250.1 | C2C2-CO-LIKE |
| At5g57660 | SALK | AT5G57660.1 | C2C2-CO-LIKE |
| At1g51700 | SALK | AT1G51700.1 | C2C2-DOF     |
| At2g28510 | SALK | AT2G28510.1 | C2C2-DOF     |
| At2g34140 | SALK | AT2G34140.1 | C2C2-DOF     |
| At2g46590 | SALK | AT2G46590.1 | C2C2-DOF     |
| At3g21270 | SALK | AT3G21270.1 | C2C2-DOF     |
| At3g50410 | SALK | AT3G50410.1 | C2C2-DOF     |
| At4g24060 | SALK | AT4G24060.1 | C2C2-DOF     |
| At5g39660 | SALK | AT5G39660.1 | C2C2-DOF     |
| At5g60200 | SALK | AT5G60200.1 | C2C2-DOF     |
| At5g60850 | SALK | AT5G60850.1 | C2C2-DOF     |
| At5g62430 | SALK | AT5G62430.1 | C2C2-DOF     |
| At5g62940 | SALK | AT5G62940.1 | C2C2-DOF     |
| At1g51600 | SALK | AT1G51600.1 | C2C2-GATA    |
| At3g06740 | SALK | AT3G06740.1 | C2C2-GATA    |
| At3g16870 | SALK | AT3G16870.1 | C2C2-GATA    |
| At3g54810 | SALK | AT3G54810.1 | C2C2-GATA    |
| At3g60530 | SALK | AT3G60530.1 | C2C2-GATA    |
| At4g17570 | SALK | AT4G17570.1 | C2C2-GATA    |
| At4g32890 | SALK | AT4G32890.1 | C2C2-GATA    |
| At4g34680 | SALK | AT4G34680.1 | C2C2-GATA    |

|           |      |             |           |
|-----------|------|-------------|-----------|
| At5g26930 | SALK | AT5G26930.1 | C2C2-GATA |
| At1g03840 | SALK | AT1G03840.1 | C2H2      |
| At1g04850 | SALK | AT1G04850.1 | C2H2      |
| At1g10480 | SALK | AT1G10480.1 | C2H2      |
| At1g24625 | SALK | AT1G24625.1 | C2H2      |
| At1g26610 | SALK | AT1G26610.1 | C2H2      |
| At1g27730 | SALK | AT1G27730.1 | C2H2      |
| At1g30970 | SALK | AT1G30970.1 | C2H2      |
| At1g34370 | SALK | AT1G34370.1 | C2H2      |
| At1g43860 | SALK | AT1G43860.1 | C2H2      |
| At1g50670 | SALK | AT1G50670.1 | C2H2      |
| At1g55110 | SALK | AT1G55110.1 | C2H2      |
| At1g55460 | SALK | AT1G55460.1 | C2H2      |
| At1g66140 | SALK | AT1G66140.1 | C2H2      |
| At1g67030 | SALK | AT1G67030.1 | C2H2      |
| At1g68130 | SALK | AT1G68130.1 | C2H2      |
| At1g68360 | SALK | AT1G68360.1 | C2H2      |
| At1g72050 | SALK | AT1G72050.1 | C2H2      |
| At1g75710 | SALK | AT1G75710.1 | C2H2      |
| At2g01650 | SALK | AT2G01650.1 | C2H2      |
| At2g24500 | SALK | AT2G24500.1 | C2H2      |
| At2g26940 | SALK | AT2G26940.1 | C2H2      |
| At2g27100 | SALK | AT2G27100.1 | C2H2      |
| At2g29660 | SALK | AT2G29660.1 | C2H2      |
| At2g36930 | SALK | AT2G36930.1 | C2H2      |
| At2g41940 | SALK | AT2G41940.1 | C2H2      |
| At2g45120 | SALK | AT2G45120.1 | C2H2      |
| At3g02790 | SALK | AT3G02790.1 | C2H2      |
| At3g10470 | SALK | AT3G10470.1 | C2H2      |
| At3g13810 | SALK | AT3G13810.1 | C2H2      |
| At3g49930 | SALK | AT3G49930.1 | C2H2      |
| At3g53600 | SALK | AT3G53600.1 | C2H2      |
| At3g57480 | SALK | AT3G57480.1 | C2H2      |
| At3g58070 | SALK | AT3G58070.1 | C2H2      |
| At3g60580 | SALK | AT3G60580.1 | C2H2      |
| At3g62240 | SALK | AT3G62240.1 | C2H2      |
| At4g16610 | SALK | AT4G16610.1 | C2H2      |
| At4g16845 | SALK | AT4G16845.1 | C2H2      |
| At4g27240 | SALK | AT4G27240.1 | C2H2      |
| At4g31420 | SALK | AT4G31420.1 | C2H2      |
| At5g03740 | SALK | AT5G03740.1 | C2H2      |
| At5g04390 | SALK | AT5G04390.1 | C2H2      |
| At5g16470 | SALK | AT5G16470.1 | C2H2      |

|           |      |             |            |
|-----------|------|-------------|------------|
| At5g25160 | SALK | AT5G25160.1 | C2H2       |
| At5g40710 | SALK | AT5G40710.1 | C2H2       |
| At5g43170 | SALK | AT5G43170.1 | C2H2       |
| At5g44160 | SALK | AT5G44160.1 | C2H2       |
| At5g51230 | SALK | AT5G51230.1 | C2H2       |
| At5g52010 | SALK | AT5G52010.1 | C2H2       |
| At5g59820 | SALK | AT5G59820.1 | C2H2       |
| At5g63280 | SALK | AT5G63280.1 | C2H2       |
| At1g67910 | SALK | AT1G67910.1 | CAMTA      |
| At5g64220 | SALK | AT5G64220.1 | CAMTA      |
| At5g08190 | SALK | AT5G08190.1 | CCAAT-DR1  |
| At5g23090 | SALK | AT5G23090.1 | CCAAT-DR1  |
| At1g72830 | SALK | AT1G72830.2 | CCAAT-HAP2 |
| At5g12840 | SALK | AT5G12840.1 | CCAAT-HAP2 |
| At2g38880 | SALK | AT2G38880.1 | CCAAT-HAP3 |
| At1g07980 | SALK | AT1G07980.1 | CCAAT-HAP5 |
| At1g08970 | SALK | AT1G08970.1 | CCAAT-HAP5 |
| At1g54830 | SALK | AT1G54830.1 | CCAAT-HAP5 |
| At1g56170 | SALK | AT1G56170.1 | CCAAT-HAP5 |
| At3g12480 | SALK | AT3G12480.1 | CCAAT-HAP5 |
| At1g47870 | SALK | AT1G47870.1 | E2F/DP     |
| At2g36010 | SALK | AT2G36010.1 | E2F/DP     |
| At3g01330 | SALK | AT3G01330.1 | E2F/DP     |
| At5g02470 | SALK | AT5G02470.1 | E2F/DP     |
| At1g73730 | SALK | AT1G73730.1 | EIL        |
| At2g27050 | SALK | AT2G27050.1 | EIL        |
| At4g25210 | SALK | AT4G25210.1 | GEBP       |
| At5g28040 | SALK | AT5G28040.1 | GEBP       |
| At1g07530 | SALK | AT1G07530.1 | GRAS       |
| At1g14920 | SALK | AT1G14920.1 | GRAS       |
| At1g50420 | SALK | AT1G50420.1 | GRAS       |
| At1g50600 | SALK | AT1G50600.1 | GRAS       |
| At2g01570 | SALK | AT2G01570.1 | GRAS       |
| At3g03450 | SALK | AT3G03450.1 | GRAS       |
| At3g54220 | SALK |             | GRAS       |



|           |      |             |         |
|-----------|------|-------------|---------|
|           |      | AT3G54220.1 |         |
| At3g60630 | SALK | AT3G60630.1 | GRAS    |
| At4g00150 | SALK | AT4G00150.1 | GRAS    |
| At4g17230 | SALK | AT4G17230.1 | GRAS    |
| At5g48150 | SALK | AT5G48150.1 | GRAS    |
| At5g52510 | SALK | AT5G52510.1 | GRAS    |
| At5g59450 | SALK | AT5G59450.1 | GRAS    |
| At2g36400 | SALK | AT2G36400.1 | GRF     |
| At1g19700 | SALK | AT1G19700.1 | HB      |
| At1g20700 | SALK | AT1G20700.1 | HB      |
| At1g26960 | SALK | AT1G26960.1 | HB      |
| At1g62990 | SALK | AT1G62990.1 | HB      |
| At1g69780 | SALK | AT1G69780.1 | HB      |
| At1g75410 | SALK | AT1G75410.1 | HB      |
| At1g79840 | SALK | AT1G79840.1 | HB      |
| At2g22430 | SALK | AT2G22430.1 | HB      |
| At2g23760 | SALK | AT2G23760.1 | HB      |
| At2g33880 | SALK | AT2G33880.1 | HB      |
| At2g35940 | SALK | AT2G35940.1 | HB      |
| At3g01220 | SALK | AT3G01220.1 | HB      |
| At3g19510 | SALK | AT3G19510.1 | HB      |
| At3g61890 | SALK | AT3G61890.1 | HB      |
| At4g16780 | SALK | AT4G16780.1 | HB      |
| At4g17460 | SALK | AT4G17460.1 | HB      |
| At4g32040 | SALK | AT4G32040.1 | HB      |
| At4g32880 | SALK | AT4G32880.1 | HB      |
| At4g35550 | SALK | AT4G35550.1 | HB      |
| At4g36870 | SALK | AT4G36870.1 | HB      |
| At4g40060 | SALK | AT4G40060.1 | HB      |
| At5g47370 | SALK | AT5G47370.1 | HB      |
| At1g32330 | SALK | AT1G32330.1 | HSF     |
| At3g02990 | SALK | AT3G02990.1 | HSF     |
| At3g22830 | SALK | AT3G22830.1 | HSF     |
| At3g24520 | SALK | AT3G24520.1 | HSF     |
| At3g51910 | SALK | AT3G51910.1 | HSF     |
| At4g11660 | SALK | AT4G11660.1 | HSF     |
| At4g13980 | SALK | AT4G13980.1 | HSF     |
| At4g18880 | SALK | AT4G18880.1 | HSF     |
| At5g45710 | SALK | AT5G45710.1 | HSF     |
| At5g62020 | SALK | AT5G62020.1 | HSF     |
| At2g38950 | SALK | AT2G38950.1 | JUMONJI |
| At4g20400 | SALK | AT4G20400.1 | JUMONJI |
| At1g71692 | SALK | AT1G71692.1 | MADS    |
| At3g57390 | SALK | AT3G57390.1 | MADS    |

|           |      |             |     |
|-----------|------|-------------|-----|
| At1g06180 | SALK | AT1G06180.1 | MYB |
| At1g09770 | SALK | AT1G09770.1 | MYB |
| At1g14350 | SALK | AT1G14350.1 | MYB |
| At1g17520 | SALK | AT1G17520.1 | MYB |
| At1g18330 | SALK | AT1G18330.1 | MYB |
| At1g19000 | SALK | AT1G19000.1 | MYB |
| At1g22640 | SALK | AT1G22640.1 | MYB |
| At1g49950 | SALK | AT1G49950.1 | MYB |
| At1g73410 | SALK | AT1G73410.1 | MYB |
| At1g74430 | SALK | AT1G74430.1 | MYB |
| At2g16720 | SALK | AT2G16720.1 | MYB |
| At2g23290 | SALK | AT2G23290.1 | MYB |
| At2g31180 | SALK | AT2G31180.1 | MYB |
| At2g37630 | SALK | AT2G37630.1 | MYB |
| At2g38090 | SALK | AT2G38090.1 | MYB |
| At2g46830 | SALK | AT2G46830.1 | MYB |
| At2g47460 | SALK | AT2G47460.1 | MYB |
| At3g09370 | SALK | AT3G09370.1 | MYB |
| At3g11440 | SALK | AT3G11440.1 | MYB |
| At3g16350 | SALK | AT3G16350.1 | MYB |
| At3g23250 | SALK | AT3G23250.1 | MYB |
| At3g49690 | SALK | AT3G49690.1 | MYB |
| At3g50060 | SALK | AT3G50060.1 | MYB |
| At3g55730 | SALK | AT3G55730.1 | MYB |
| At4g05100 | SALK | AT4G05100.1 | MYB |
| At4g09460 | SALK | AT4G09460.1 | MYB |
| At4g39160 | SALK | AT4G39160.1 | MYB |
| At5g02840 | SALK | AT5G02840.1 | MYB |
| At5g04760 | SALK | AT5G04760.1 | MYB |
| At5g05790 | SALK | AT5G05790.1 | MYB |
| At5g08520 | SALK | AT5G08520.1 | MYB |
| At5g14750 | SALK | AT5G14750.1 | MYB |
| At5g26660 | SALK | AT5G26660.1 | MYB |
| At5g40330 | SALK | AT5G40330.1 | MYB |
| At5g47390 | SALK | AT5G47390.1 | MYB |
| At5g52260 | SALK | AT5G52260.1 | MYB |
| At5g52660 | SALK | AT5G52660.1 | MYB |
| At5g58900 | SALK | AT5G58900.1 | MYB |
| At5g65790 | SALK | AT5G65790.1 | MYB |
| At5g67300 | SALK | AT5G67300.1 | MYB |
| At5g67580 | SALK | AT5G67580.1 | MYB |
| At1g01010 | SALK | AT1G01010.1 | NAC |
| At1g12260 | SALK | AT1G12260.1 | NAC |

|           |      |             |          |
|-----------|------|-------------|----------|
| At1g25580 | SALK | AT1G25580.1 | NAC      |
| At1g33060 | SALK | AT1G33060.1 | NAC      |
| At1g34190 | SALK | AT1G34190.1 | NAC      |
| At1g52880 | SALK | AT1G52880.1 | NAC      |
| At1g52890 | SALK | AT1G52890.1 | NAC      |
| At1g69490 | SALK | AT1G69490.1 | NAC      |
| At1g77450 | SALK | AT1G77450.1 | NAC      |
| At3g10500 | SALK | AT3G10500.1 | NAC      |
| At3g15500 | SALK | AT3G15500.1 | NAC      |
| At3g29035 | SALK | AT3G29035.1 | NAC      |
| At3g49530 | SALK | AT3G49530.1 | NAC      |
| At4g27410 | SALK | AT4G27410.2 | NAC      |
| At4g35580 | SALK | AT4G35580.1 | NAC      |
| At5g04410 | SALK | AT5G04410.1 | NAC      |
| At5g13180 | SALK | AT5G13180.1 | NAC      |
| At5g14000 | SALK | AT5G14000.1 | NAC      |
| At5g18270 | SALK | AT5G18270.1 | NAC      |
| At5g22290 | SALK | AT5G22290.1 | NAC      |
| At5g24590 | SALK | AT5G24590.2 | NAC      |
| At5g46590 | SALK | AT5G46590.1 | NAC      |
| At5g62380 | SALK | AT5G62380.1 | NAC      |
| At5g63790 | SALK | AT5G63790.1 | NAC      |
| At5g66300 | SALK | AT5G66300.1 | NAC      |
| At1g20640 | SALK | AT1G20640.1 | NIN-LIKE |
| At1g64530 | SALK | AT1G64530.1 | NIN-LIKE |
| At1g05380 | SALK | AT1G05380.1 | PHD      |
| At2g36720 | SALK | AT2G36720.1 | PHD      |
| At1g69170 | SALK | AT1G69170.1 | SBP      |
| At1g76580 | SALK | AT1G76580.1 | SBP      |
| At3g60030 | SALK | AT3G60030.1 | SBP      |
| At5g18830 | SALK | AT5G18830.1 | SBP      |
| At5g43270 | SALK | AT5G43270.1 | SBP      |
| At1g58100 | SALK | AT1G58100.1 | TCP      |
| At3g27010 | SALK | AT3G27010.1 | TCP      |
| At3g47620 | SALK | AT3G47620.1 | TCP      |
| At5g08330 | SALK | AT5G08330.1 | TCP      |
| At5g51910 | SALK | AT5G51910.1 | TCP      |
| At1g33240 | SALK | AT1G33240.1 | TRIHELIX |
| At1g54060 | SALK | AT1G54060.1 | TRIHELIX |
| At1g76880 | SALK | AT1G76880.1 | TRIHELIX |
| At1g76890 | SALK | AT1G76890.2 | TRIHELIX |
| At2g44730 | SALK | AT2G44730.1 | TRIHELIX |
| At3g14180 | SALK | AT3G14180.1 | TRIHELIX |
| At3g24490 | SALK | AT3G24490.1 | TRIHELIX |

|           |      |             |          |
|-----------|------|-------------|----------|
| At3g54390 | SALK | AT3G54390.1 | TRIHELIX |
| At5g01380 | SALK | AT5G01380.1 | TRIHELIX |
| At1g25280 | SALK | AT1G25280.2 | TUB      |
| At1g53320 | SALK | AT1G53320.1 | TUB      |
| At1g76900 | SALK | AT1G76900.1 | TUB      |
| At2g18280 | SALK | AT2G18280.1 | TUB      |
| At2g47900 | SALK | AT2G47900.1 | TUB      |
| At3g06380 | SALK | AT3G06380.1 | TUB      |
| At5g18680 | SALK | AT5G18680.1 | TUB      |
| At1g69810 | SALK | AT1G69810.1 | WRKY     |
| At1g80840 | SALK | AT1G80840.1 | WRKY     |
| At2g23320 | SALK | AT2G23320.1 | WRKY     |
| At2g24570 | SALK | AT2G24570.1 | WRKY     |
| At2g30250 | SALK | AT2G30250.1 | WRKY     |
| At2g30590 | SALK | AT2G30590.1 | WRKY     |
| At2g46400 | SALK | AT2G46400.1 | WRKY     |
| At2g47260 | SALK | AT2G47260.1 | WRKY     |
| At3g56400 | SALK | AT3G56400.1 | WRKY     |
| At3g58710 | SALK | AT3G58710.1 | WRKY     |
| At4g01250 | SALK | AT4G01250.1 | WRKY     |
| At4g23810 | SALK | AT4G23810.1 | WRKY     |
| At4g24240 | SALK | AT4G24240.1 | WRKY     |
| At4g26640 | SALK | AT4G26640.1 | WRKY     |
| At4g30935 | SALK | AT4G30935.1 | WRKY     |
| At4g31550 | SALK | AT4G31550.1 | WRKY     |
| At5g15130 | SALK | AT5G15130.1 | WRKY     |
| At5g22570 | SALK | AT5G22570.1 | WRKY     |
| At1g14440 | SALK | AT1G14440.1 | ZF-HD    |
| At1g75240 | SALK | AT1G75240.1 | ZF-HD    |
| At3g28920 | SALK | AT3G28920.1 | ZF-HD    |
| At5g15210 | SALK | AT5G15210.1 | ZF-HD    |
| At5g39760 | SALK | AT5G39760.1 | ZF-HD    |
| At3g63350 | TIGR | AT3G63350.1 | HSF      |
| At3g58780 | TIGR | AT3G58780.1 | MADS     |
| At4g28500 | TIGR | AT4G28500.1 | NAC      |
| At2g43500 | TIGR | AT2G43500.1 | NIN-LIKE |
| At2g02540 | TIGR | AT2G02540.1 | ZF-HD    |

The 653 transcription factors in the stele collection, their pENTR vector sources, gene models, and transcription factor family.

**Supplementary Table 2**

| Transcription Factor | Interaction | Target    |
|----------------------|-------------|-----------|
| AT1G07640            | PD          | AT1G30490 |
| AT1G12610            | PD          | AT1G30490 |
| AT1G47870            | PD          | AT1G30490 |
| AT1G61730            | PD          | AT1G30490 |
| AT1G76880            | PD          | AT1G30490 |
| AT3G19290            | PD          | AT1G30490 |
| AT3G45610            | PD          | AT1G30490 |
| AT3G55370            | PD          | AT1G30490 |
| AT3G61850            | PD          | AT1G30490 |
| AT5G05410            | PD          | AT1G30490 |
| AT5G63790            | PD          | AT1G30490 |
| AT1G12610            | PD          | AT1G62990 |
| AT4G01680            | PD          | AT1G62990 |
| AT5G18560            | PD          | AT1G62990 |
| AT5G52020            | PD          | AT1G62990 |
| AT4G28500            | PD          | AT1G64620 |
| AT1G04880            | PD          | AT1G71930 |
| AT1G12610            | PD          | AT1G71930 |
| AT1G47870            | PD          | AT1G71930 |
| AT1G52880            | PD          | AT1G71930 |
| AT1G61730            | PD          | AT1G71930 |
| AT1G68360            | PD          | AT1G71930 |
| AT1G76510            | PD          | AT1G71930 |
| AT4G37260            | PD          | AT1G71930 |
| AT5G18560            | PD          | AT1G71930 |
| AT5G61590            | PD          | AT1G71930 |
| AT5G61600            | PD          | AT1G71930 |
| AT5G63790            | PD          | AT1G71930 |
| AT1G03840            | PD          | AT2G34710 |
| AT1G07640            | PD          | AT2G34710 |
| AT1G10480            | PD          | AT2G34710 |
| AT1G12610            | PD          | AT2G34710 |
| AT1G13960            | PD          | AT2G34710 |
| AT1G61730            | PD          | AT2G34710 |
| AT1G64620            | PD          | AT2G34710 |
| AT1G66140            | PD          | AT2G34710 |
| AT1G68360            | PD          | AT2G34710 |
| AT1G71930            | PD          | AT2G34710 |
| AT2G01570            | PD          | AT2G34710 |
| AT2G28810            | PD          | AT2G34710 |
| AT2G33880            | PD          | AT2G34710 |
| AT2G37590            | PD          | AT2G34710 |
| AT2G38340            | PD          | AT2G34710 |
| AT2G47890            | PD          | AT2G34710 |
| AT3G01970            | PD          | AT2G34710 |
| AT3G19580            | PD          | AT2G34710 |

|           |    |           |
|-----------|----|-----------|
| AT3G23690 | PD | AT2G34710 |
| AT3G28920 | PD | AT2G34710 |
| AT3G45610 | PD | AT2G34710 |
| AT3G50410 | PD | AT2G34710 |
| AT3G55370 | PD | AT2G34710 |
| AT3G61850 | PD | AT2G34710 |
| AT4G14560 | PD | AT2G34710 |
| AT5G14000 | PD | AT2G34710 |
| AT5G15210 | PD | AT2G34710 |
| AT5G43270 | PD | AT2G34710 |
| AT5G60850 | PD | AT2G34710 |
| AT5G63790 | PD | AT2G34710 |
| <hr/>     |    |           |
| AT1G04880 | PD | AT3G25710 |
| AT1G68360 | PD | AT3G25710 |
| AT1G76580 | PD | AT3G25710 |
| AT2G36400 | PD | AT3G25710 |
| AT2G46400 | PD | AT3G25710 |
| AT3G11580 | PD | AT3G25710 |
| AT3G20310 | PD | AT3G25710 |
| AT4G32800 | PD | AT3G25710 |
| AT4G36730 | PD | AT3G25710 |
| AT5G05410 | PD | AT3G25710 |
| AT5G61590 | PD | AT3G25710 |
| <hr/>     |    |           |
| AT1G02220 | PD | AT3G43430 |
| AT1G04880 | PD | AT3G43430 |
| AT1G12610 | PD | AT3G43430 |
| AT1G68360 | PD | AT3G43430 |
| AT2G28810 | PD | AT3G43430 |
| AT4G28500 | PD | AT3G43430 |
| AT4G29230 | PD | AT3G43430 |
| AT4G34610 | PD | AT3G43430 |
| AT5G24590 | PD | AT3G43430 |
| <hr/>     |    |           |
| AT1G04880 | PD | AT4G37650 |
| AT1G12610 | PD | AT4G37650 |
| AT1G29160 | PD | AT4G37650 |
| AT1G54060 | PD | AT4G37650 |
| AT1G61730 | PD | AT4G37650 |
| AT3G20770 | PD | AT4G37650 |
| AT4G32800 | PD | AT4G37650 |
| AT5G63790 | PD | AT4G37650 |
| <hr/>     |    |           |
| AT1G04880 | PD | AT5G12870 |
| AT1G49720 | PD | AT5G12870 |
| AT1G61730 | PD | AT5G12870 |
| AT1G68360 | PD | AT5G12870 |
| AT1G76580 | PD | AT5G12870 |
| AT1G76880 | PD | AT5G12870 |
| AT2G26150 | PD | AT5G12870 |
| AT2G46270 | PD | AT5G12870 |
| AT4G36730 | PD | AT5G12870 |
| AT5G10510 | PD | AT5G12870 |

|           |    |           |
|-----------|----|-----------|
| AT5G43700 | PD | AT5G12870 |
| AT1G05805 | PD | AT5G25160 |
| AT1G12610 | PD | AT5G25160 |
| AT1G71930 | PD | AT5G25160 |
| AT1G76880 | PD | AT5G25160 |
| AT2G44730 | PD | AT5G25160 |
| AT3G11580 | PD | AT5G25160 |
| AT4G32800 | PD | AT5G25160 |
| AT5G52020 | PD | AT5G25160 |
| AT5G63790 | PD | AT5G25160 |
| AT1G12610 | PD | AT5G53980 |
| AT2G36400 | PD | AT5G53980 |
| AT3G25730 | PD | AT5G53980 |
| AT4G36730 | PD | AT5G53980 |
| AT5G04340 | PD | AT5G53980 |
| AT5G05610 | PD | AT5G53980 |
| AT5G63790 | PD | AT5G53980 |
| AT1G12610 | PD | AT5G60200 |
| AT1G47870 | PD | AT5G60200 |
| AT1G67030 | PD | AT5G60200 |
| AT1G73410 | PD | AT5G60200 |
| AT3G45610 | PD | AT5G60200 |
| AT3G49930 | PD | AT5G60200 |
| AT5G15210 | PD | AT5G60200 |
| AT5G63790 | PD | AT5G60200 |
| AT1G01260 | PD | AT5G60690 |
| AT1G07640 | PD | AT5G60690 |
| AT1G12610 | PD | AT5G60690 |
| AT1G13960 | PD | AT5G60690 |
| AT1G20700 | PD | AT5G60690 |
| AT1G21910 | PD | AT5G60690 |
| AT1G24625 | PD | AT5G60690 |
| AT1G51700 | PD | AT5G60690 |
| AT1G52880 | PD | AT5G60690 |
| AT1G53320 | PD | AT5G60690 |
| AT1G61730 | PD | AT5G60690 |
| AT1G64620 | PD | AT5G60690 |
| AT1G66140 | PD | AT5G60690 |
| AT1G67030 | PD | AT5G60690 |
| AT1G68360 | PD | AT5G60690 |
| AT1G71930 | PD | AT5G60690 |
| AT2G26150 | PD | AT5G60690 |
| AT2G28810 | PD | AT5G60690 |
| AT2G37590 | PD | AT5G60690 |
| AT2G38340 | PD | AT5G60690 |
| AT2G41940 | PD | AT5G60690 |
| AT3G15510 | PD | AT5G60690 |
| AT3G21270 | PD | AT5G60690 |
| AT3G22760 | PD | AT5G60690 |
| AT3G45610 | PD | AT5G60690 |
| AT3G50410 | PD | AT5G60690 |

|           |    |           |
|-----------|----|-----------|
| AT3G55370 | PD | AT5G60690 |
| AT3G61850 | PD | AT5G60690 |
| AT4G29230 | PD | AT5G60690 |
| AT4G34610 | PD | AT5G60690 |
| AT5G10510 | PD | AT5G60690 |
| AT5G14000 | PD | AT5G60690 |
| AT5G25160 | PD | AT5G60690 |
| AT5G60200 | PD | AT5G60690 |
| AT5G63790 | PD | AT5G60690 |
| AT5G65210 | PD | AT5G60690 |
| AT5G66730 | PD | AT5G60690 |

Identified transcription factor-promoter interactions.



### Supplementary Table 3

AT1G01260  
AT1G02220  
AT1G03840  
AT1G04880  
AT1G05805  
AT1G07640  
AT1G10480  
AT1G12610  
AT1G13960  
AT1G20700  
AT1G21910  
AT1G24625  
AT1G29160  
AT1G47870  
AT1G49720  
AT1G51700  
AT1G52880  
AT1G53320  
AT1G54060  
AT1G61730  
AT1G64620  
AT1G66140  
AT1G67030  
AT1G68360  
AT1G71930  
AT1G73410  
AT1G76510  
AT1G76580  
AT1G76880  
AT2G01570  
AT2G26150  
AT2G28810  
AT2G33880  
AT2G36400  
AT2G37590  
AT2G38340  
AT2G41940  
AT2G44730  
AT2G46270  
AT2G46400  
AT2G47890  
AT3G01970  
AT3G11580  
AT3G15510  
AT3G19290

AT3G19580  
AT3G20310  
AT3G20770  
AT3G21270  
AT3G22760  
AT3G23690  
AT3G25730  
AT3G28920  
AT3G45610  
AT3G49930  
AT3G50410  
AT3G55370  
AT3G61850  
AT4G01680  
AT4G14560  
AT4G28500  
AT4G29230  
AT4G32800  
AT4G34610  
AT4G36730  
AT4G37260  
AT5G04340  
AT5G05410  
AT5G05610  
AT5G10510  
AT5G14000  
AT5G15210  
AT5G18560  
AT5G24590  
AT5G25160  
AT5G43270  
AT5G43700  
AT5G52020  
AT5G60200  
AT5G60850  
AT5G61590  
AT5G61600  
AT5G63790  
AT5G65210  
AT5G66730

Interacting transcription factors.

## **Supplementary Notes**

### ***Identification of Transcription Factors Expressed in the Root Stele***

Seven hundred and eight transcription factors are expressed in the stele as determined by microarray expression data that profile expression in 10 GFP marker lines covering one or multiple cell types of the stele (APL, JO121, J2661, S17, S18, S4, S32, SUC2, WOL, J2501)<sup>1</sup>. We selected transcription factors (annotated in one of three databases) that were at least expressed in one of these marker lines. The expression presence threshold was determined as described before <sup>2</sup>.

### ***Comparison of Direct Transformation vs. Mating and the High Copy Number<sup>3</sup> and Low Copy Number AD Vector***

We tested interaction differences between direct transformation and mating with a promoter (*REV*) that previously had multiple transcription factor interactors. Using the mating platform with the AD vector we identified 40% (2 of 5) interactions that were obtained using direct transformation. This was a consistent finding when using other promoters. Specifically, interactions obtained using the *HIS3* reporter were weak or inconsistent. Using the direct transformation method with the AD-2 $\mu$  vector, 100% overlap in interactions was observed as compared to the low copy AD vector. We obtained a 44% overlap of interactions between mating with AD-2 $\mu$  vector and the direct transformation assays. Two of the four positives which did not overlap were obtained as positives with only one reporter, *LacZ*, in the direct transformation assays with both vectors. This suggests that the mating assay has increased sensitivity as compared to direct transformation. The weak and inconsistent results observed with the *HIS3* reporter were rectified in mating with the AD-2 $\mu$  vector. Increased sensitivity of the *LacZ* reporter was also observed, both in terms of the number of interactions and the length of time to observe a positive interaction.

### ***Hand Replicator***

Additionally, we tested the use of a hand replicator to perform this pipeline. We screened the *REV* promoter with the robot and with a hand replicator against the same 94 transcription factor prey described in the Supplementary Note “*Comparison of Direction Transformation vs. Mating and the High Copy Number and Low Copy Number AD Vector*”. We obtained 8 interactions with robot and 9 interactions from hand replicator. This demonstrates the flexibility of the eY1H pipeline.

### ***Comparison of Efficiency in Labor, Cost and Time***

#### *Labor and Time*

For direct transformation, we can reasonably transform 2 promoters against 7 transcription factor plates with no technical replicates in one day (1, 330 interactions). This will comprise 40 days of labor and 33 days for results for the full transcription factor resource. For mating, we can reasonably mate 20 promoters against 7 transcription factor plates with 4 technical replicates in one day (51,520 interactions; 2 days labor and 8 days for results). For 10 promoters, accounting for diploid selection and reporter plates, this will take 10 days for screening. For the robotic mating, a program can be set and run without constant supervision.

#### *Costs*

Automation allows us to screen 384 interactions in a single transcription factor plate against multiple promoters in a day. It is more cost-effective to screen multiple promoters at once; this reduces ethanol and plate costs.

- 1 Brady, S. M. *et al.* A High-Resolution Root Spatiotemporal Map Reveals Dominant Expression Patterns. *Science* **318**, 801-806, doi:10.1126/science.1146265 (2007).
- 2 Levesque, M. P. *et al.* Whole-Genome Analysis of the SHORT-ROOT Developmental Pathway in Arabidopsis. *PLoS Biology* **4**, e143 (2006).
- 3 Reece-Hoyes, J. S. *et al.* Enhanced yeast one-hybrid (eY1H) assays for high-throughput gene-centered regulatory network mapping. *Nature Methods* (In Press).
